# Supplementary material for: Identifying breast cancer patients at risk of relapse despite pathological complete response after neoadjuvant therapy
Source: PubMed Central journal article supplement (PMC10082019; doi:10.1038/s41523-023-00525-2), 2023-04-07
Supplement: 41523_2023_525_MOESM1_ESM.pdf [file 41523_2023_525_MOESM1_ESM.pdf]

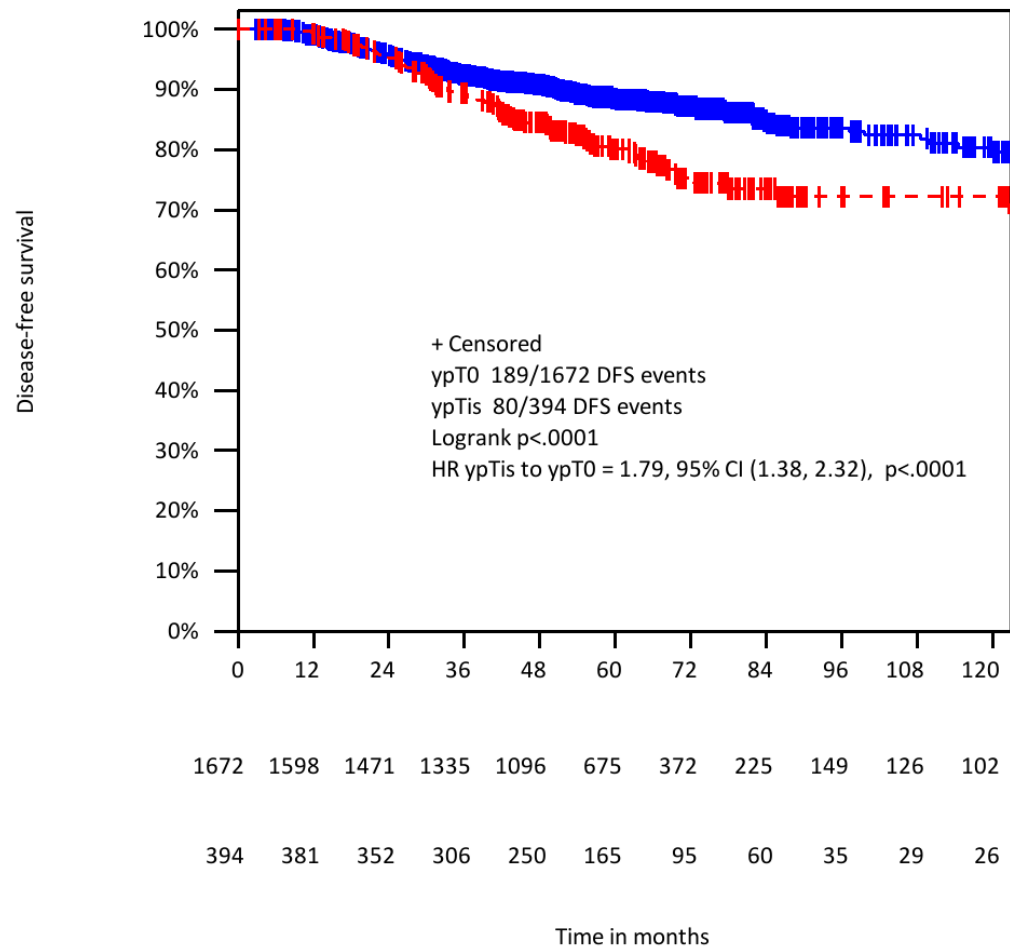

Supplementary figure 1a: Kaplan-Meier curves of disease-free survival according to residual in situ disease.

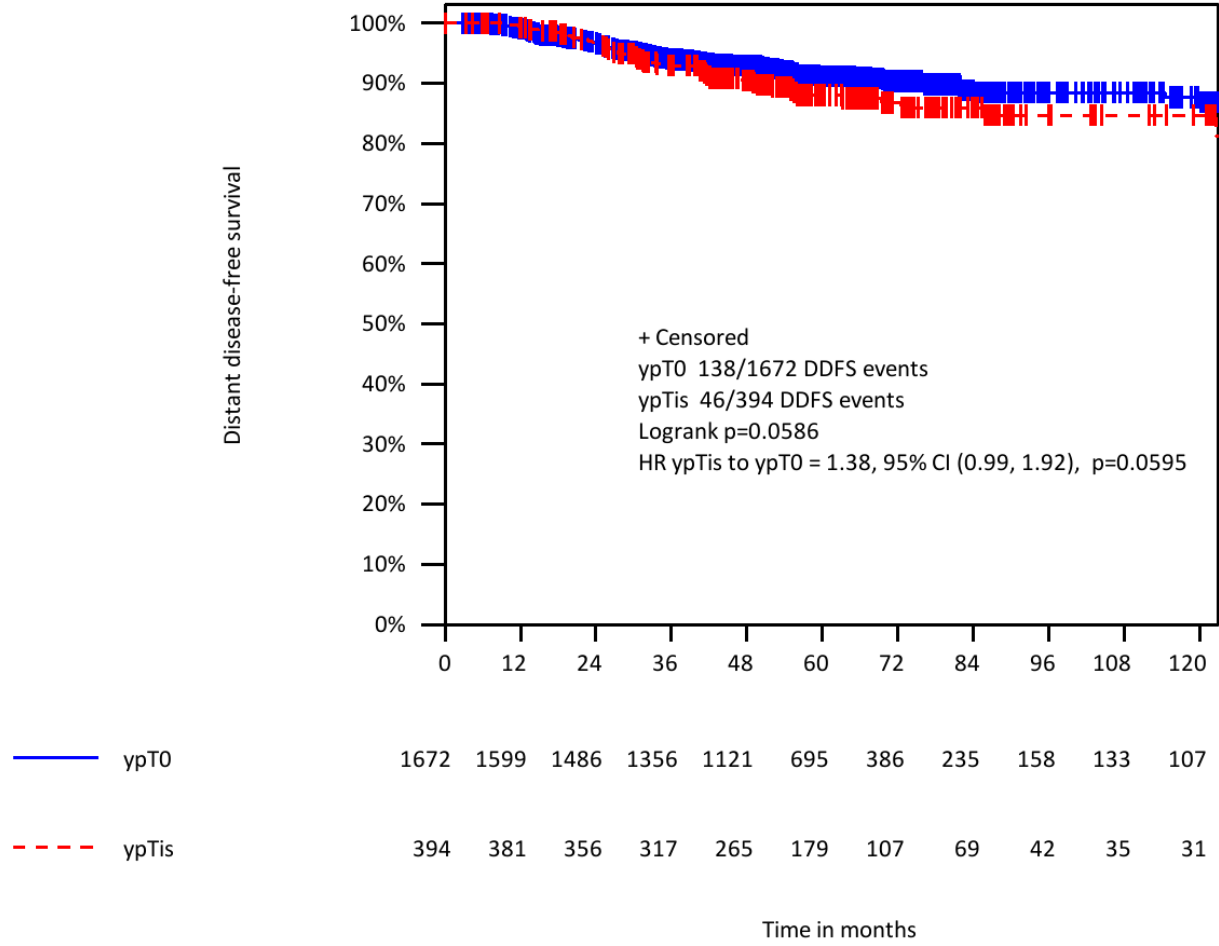

Supplementary figure 1b: Kaplan-Meier curves of distant disease-free survival according to residual in situ disease.

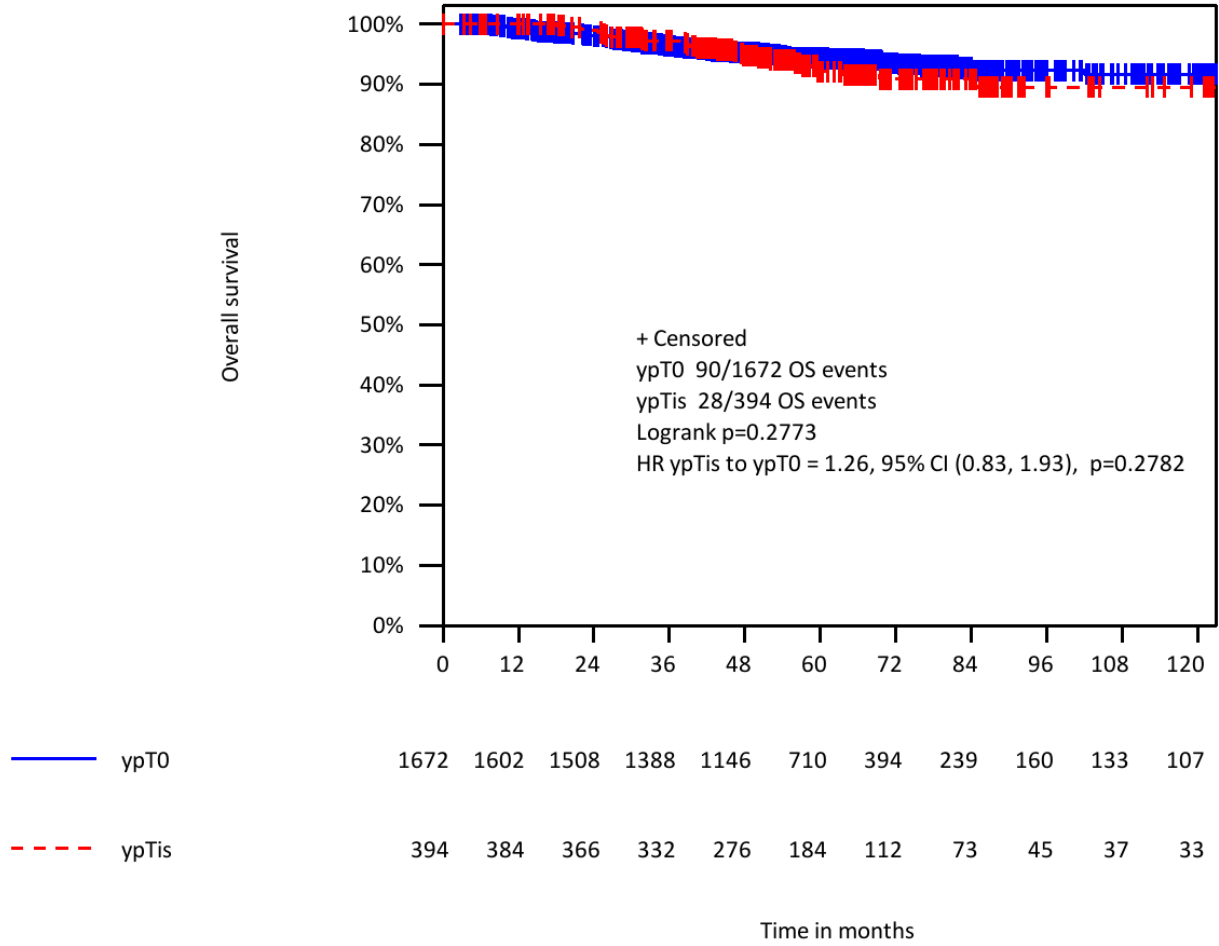

Supplementary figure 1c: Kaplan-Meier curves of overall survival according to residual in situ disease.

Supplementary table 1: Inclusion criteria and design per study

| Study        | Inclusion criteria                          | Tumor subtypes         | Study arms             |                               |
|--------------|---------------------------------------------|------------------------|------------------------|-------------------------------|
|              |                                             |                        | <i>control</i>         | <i>experimental</i>           |
| GeparTrio    | High risk: <36 years, >cT2, HR-,cN+, G3     | all                    | 2*DocAC-4*DocAC        | 2*DocAC-NX<br>2*DocAC-6*DocAC |
| GeparQuattro | cT3orcT4, HR-, HR+ and cN+                  | all                    | EC-Doc                 | EC-DocX, EC-Doc-X             |
| GeparQuinto  | cT3/4, cT2 if HR- or cN+, cT1 if HR- or pN+ | HER2+                  | EC-Doc+T               | EC-Doc+ Lap                   |
|              |                                             | HER2-                  | EC-Doc                 | EC-Doc + Bev                  |
|              |                                             | Non responder after EC | EC-P                   | EC-P +RAD001                  |
| GeparSixto   | cT2-4 or CT1c if N+                         | TNBC                   | PM+Bev                 | PMCb+Bev                      |
|              |                                             | HER2+                  | PM+T+Lap               | PMCb+T+Lap                    |
| GeparSepto   | cT2-4, cT1c and cN+ or high risk            | all                    | P-EC (+T+Per if HER2+) | nabP-EC (+T+Per if HER2+)     |

A: adriamycine; Bev: Bevacizumab; C: cyclophosphamide; Cb: carboplatinum; Doc: docetaxel; E: epirubicine; Lap: lapatinib; M: myocet; N: vinorelbine; nabP: nabPaclitaxel; P: paclitaxel; PE: pertuzumab; RAD001: everolimus; T: trastuzumab; X: capecitabine, HR: hormone receptor, TNBC: triple negative breast cancer
